# Supplementary material for: The Effect of Vitamin E Supplementation in Postmenopausal Women—A Systematic Review
Source: MDPI journal article supplement (doi:10.3390/nu15010160), 2022-12-29
Supplement: s1 [file s1]

Supplementary Table S1. The Newcastle-Ottawa scale for quality assessment of included studies

| Item                                                                       | Authors               |                       |                                     |                         |                               |                     |                                 |                                |                      |                      |                    |                   |                      |                          |                           |                           |
|----------------------------------------------------------------------------|-----------------------|-----------------------|-------------------------------------|-------------------------|-------------------------------|---------------------|---------------------------------|--------------------------------|----------------------|----------------------|--------------------|-------------------|----------------------|--------------------------|---------------------------|---------------------------|
|                                                                            | Ziagham et al. (2012) | Ziagham et al. (2013) | Parnan Emamverdikhani et al. (2016) | Golmakani et al. (2018) | Cancelo Hidalgo et al. (2006) | Ziaei et al. (2007) | Ataei-Almanghadim et al. (2019) | Farshbaf-Khalili et al. (2022) | Guetta et al. (1995) | Wander et al. (1996) | Inal et al. (1997) | Koh et al. (1999) | Rasool et al. (2003) | Ushiroyama et al. (2006) | Alves Luzia et al. (2015) | Rezasoltani et al. (2021) |
| <b>A Selection</b>                                                         |                       |                       |                                     |                         |                               |                     |                                 |                                |                      |                      |                    |                   |                      |                          |                           |                           |
| Exposed truly representative of average                                    | 0                     | 0                     | 0                                   | 0                       | 1                             | 0                   | 1                               | 0                              | 0                    | 1                    | 0                  | 0                 | 0                    | 1                        | 0                         | 1                         |
| Selection of non-exposed from the same community                           | 0                     | 1                     | 0                                   | 0                       | 0                             | 0                   | 1                               | 1                              | 0                    | 0                    | 0                  | 0                 | 1                    | 0                        | 1                         | 1                         |
| Exposure of ascertained by secure record or interview                      | 1                     | 1                     | 1                                   | 1                       | 1                             | 0                   | 1                               | 1                              | 1                    | 1                    | 1                  | 1                 | 1                    | 1                        | 1                         | 1                         |
| Demonstration of outcome of interest not present at the start of the study | 1                     | 1                     | 1                                   | 1                       | 1                             | 1                   | 1                               | 1                              | 1                    | 1                    | 1                  | 1                 | 1                    | 1                        | 1                         | 1                         |
| <b>B Comparability</b>                                                     |                       |                       |                                     |                         |                               |                     |                                 |                                |                      |                      |                    |                   |                      |                          |                           |                           |
| Study controls for other variables                                         | 1                     | 1                     | 1                                   | 1                       | 1                             | 0                   | 1                               | 1                              | 1                    | 0                    | 1                  | 0                 | 1                    | 1                        | 1                         | 1                         |
| <b>C Outcome</b>                                                           |                       |                       |                                     |                         |                               |                     |                                 |                                |                      |                      |                    |                   |                      |                          |                           |                           |
| Follow up long enough for outcome to occur                                 | 1                     | 1                     | 1                                   | 1                       | 1                             | 0                   | 1                               | 1                              | 0                    | 0                    | 1                  | 1                 | 1                    | 1                        | 1                         | 0                         |
| Complete follow up of all subjects accounted for                           | 1                     | 1                     | 1                                   | 1                       | 0                             | 1                   | 1                               | 1                              | 1                    | 0                    | 1                  | 0                 | 1                    | 1                        | 1                         | 0                         |
| Subject to follow up unlikely to introduce biases?                         | 0                     | 0                     | 0                                   | 0                       | 0                             | 0                   | 0                               | 0                              | 0                    | 0                    | 0                  | 0                 | 0                    | 0                        | 0                         | 0                         |
| Assessment of outcomes                                                     | 1                     | 1                     | 1                                   | 1                       | 1                             | 1                   | 1                               | 1                              | 1                    | 1                    | 1                  | 1                 | 1                    | 1                        | 1                         | 1                         |
| <b>Score</b>                                                               | <b>6</b>              | <b>7</b>              | <b>6</b>                            | <b>6</b>                | <b>6</b>                      | <b>3</b>            | <b>8</b>                        | <b>7</b>                       | <b>5</b>             | <b>4</b>             | <b>6</b>           | <b>4</b>          | <b>7</b>             | <b>7</b>                 | <b>7</b>                  | <b>6</b>                  |
